# Supplementary material for: ΔNp63 is a pioneer factor that binds inaccessible chromatin and elicits chromatin remodeling
Source: PubMed Central journal article supplement (PMC8053304; doi:10.1186/s13072-021-00394-8), 2021-04-17
Supplement: 13072_2021_394_MOESM1_ESM.pdf [file 13072_2021_394_MOESM1_ESM.pdf]

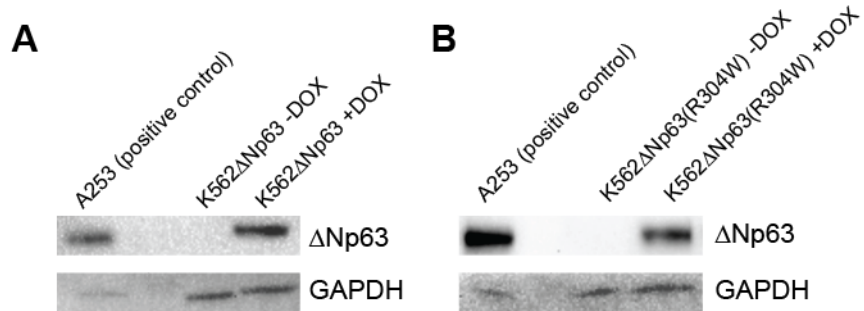

**Figure S1. Western blot analysis confirmed the expression of  $\Delta$ Np63 in K562.**

(A)  $\Delta$ Np63 $\alpha$  expression was induced in K562 with 300ng/ml of doxycycline (DOX). A253 is an epithelial cell line originally expressing  $\Delta$ Np63, which was used as positive control here. (B)  $\Delta$ Np63(R304W) expression after Dox induction in K562.

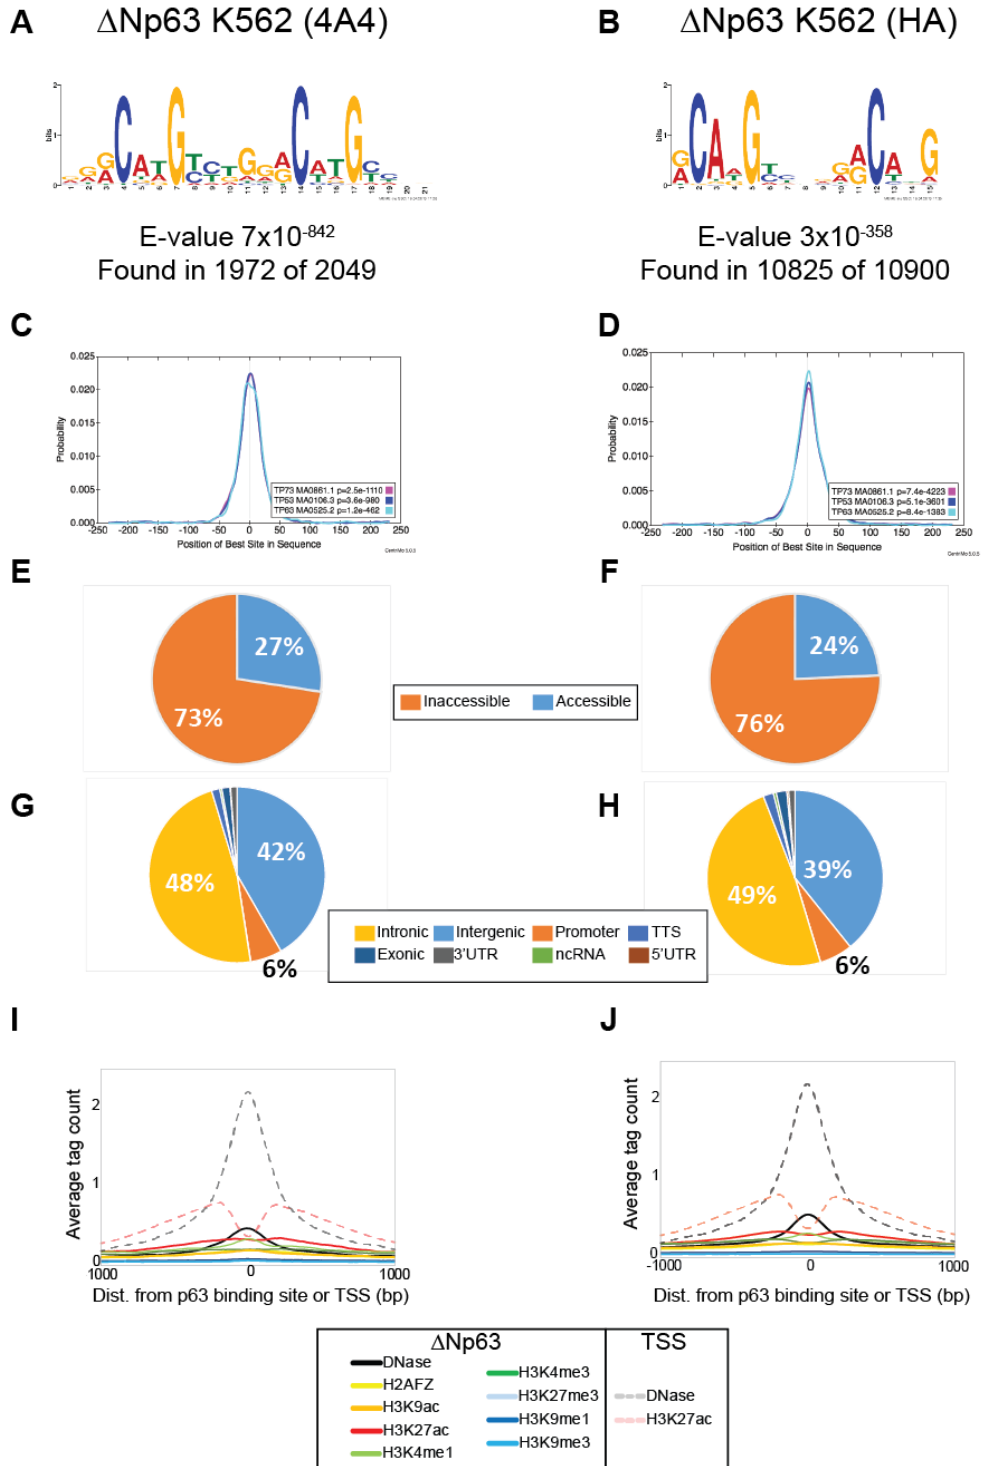

**Figure S2. Replicate  $\Delta$ Np63 ChIP-seq experiments.**

(A-B) MEME analysis for  $\Delta$ Np63 ChIP-seq replicates 1 and 2 [4]. (C-D) CentriMo analysis showing the center enrichment for three p53 family members' motif (p53, p63, p73) for  $\Delta$ Np63 ChIP-seq replicates 1 and 2 [7]. (E-F) Chromatin accessibility  $\Delta$ Np63 bound sites for each replicate in K562. Accessibility is defined from the synthesis track of DNase and FAIRE from ENCODE (GEO GSE40833 GSM1002657) [8]. (G-H) Genomic annotation for  $\Delta$ Np63 bound sites for each replicate in K562. (I-J) Average chromatin architecture in K562 at  $\Delta$ Np63 ChIP-seq summits for each replicate experiment compared to 72291 transcriptional start site (TSS). Data is plotted for 2 kb flanking the summit or TSS.

**A**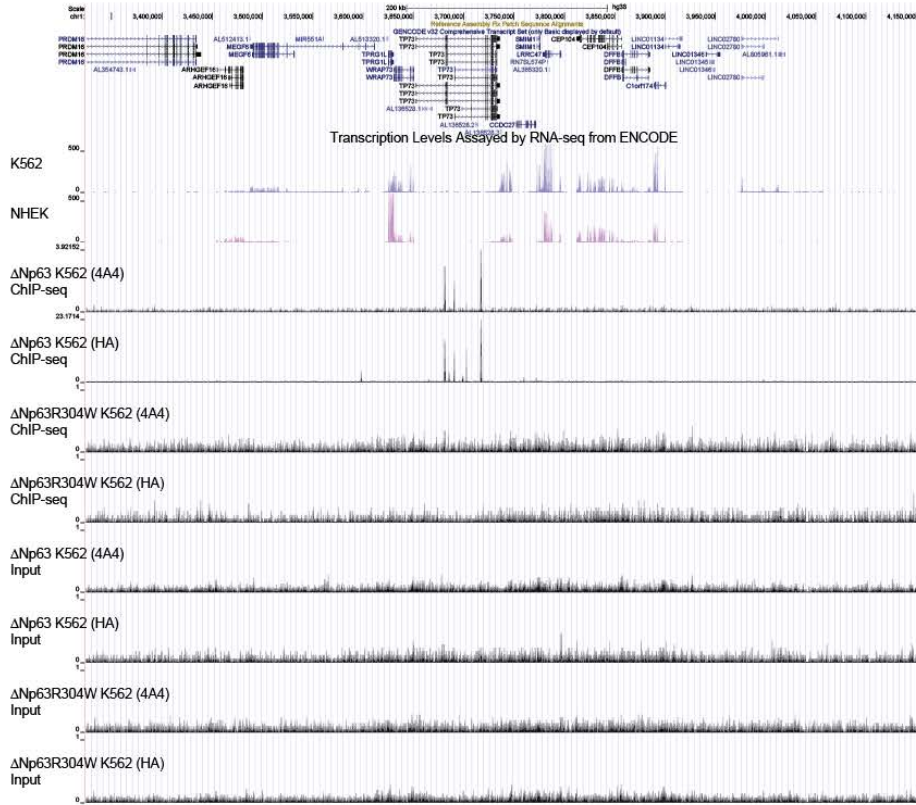**B**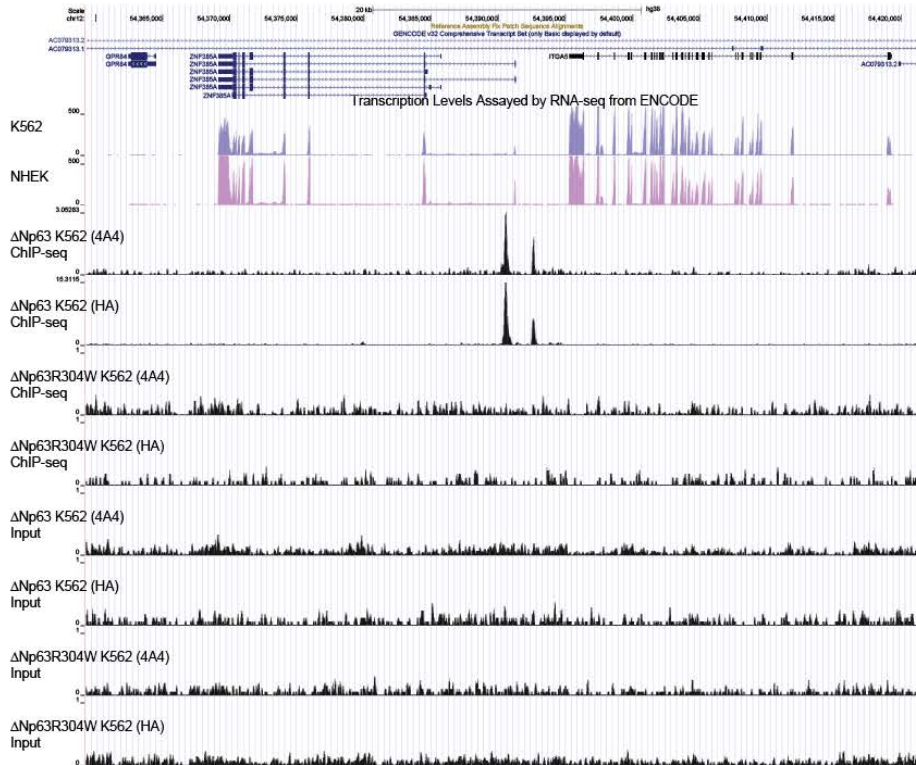

**C**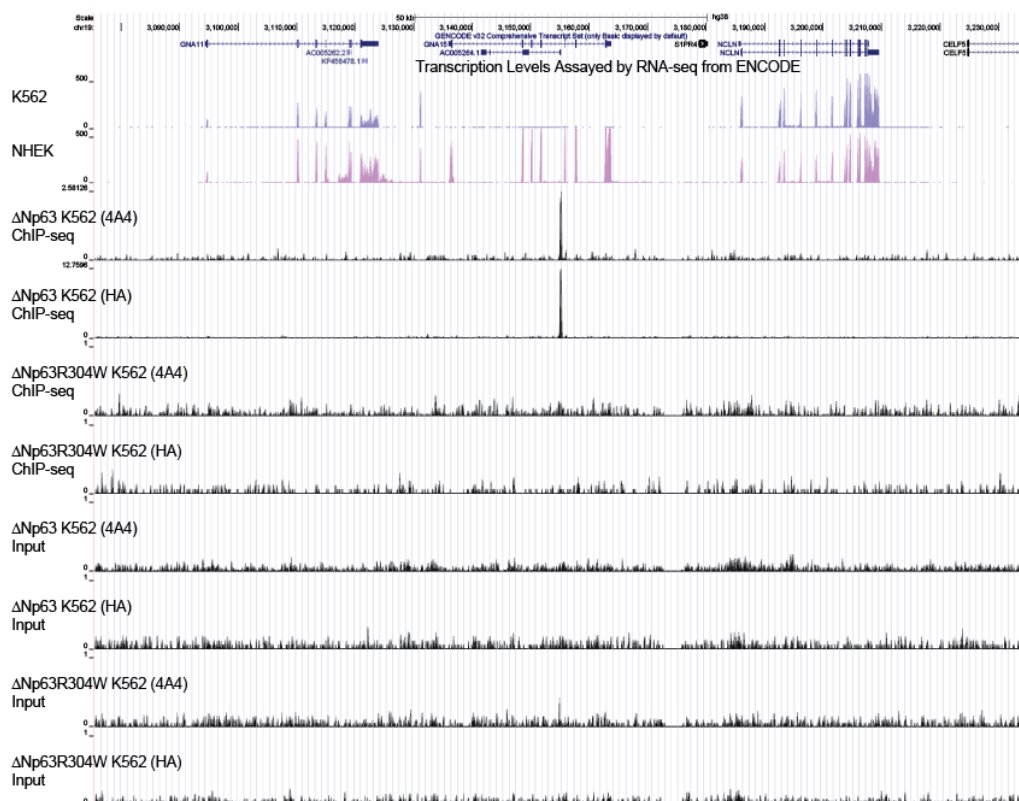**D**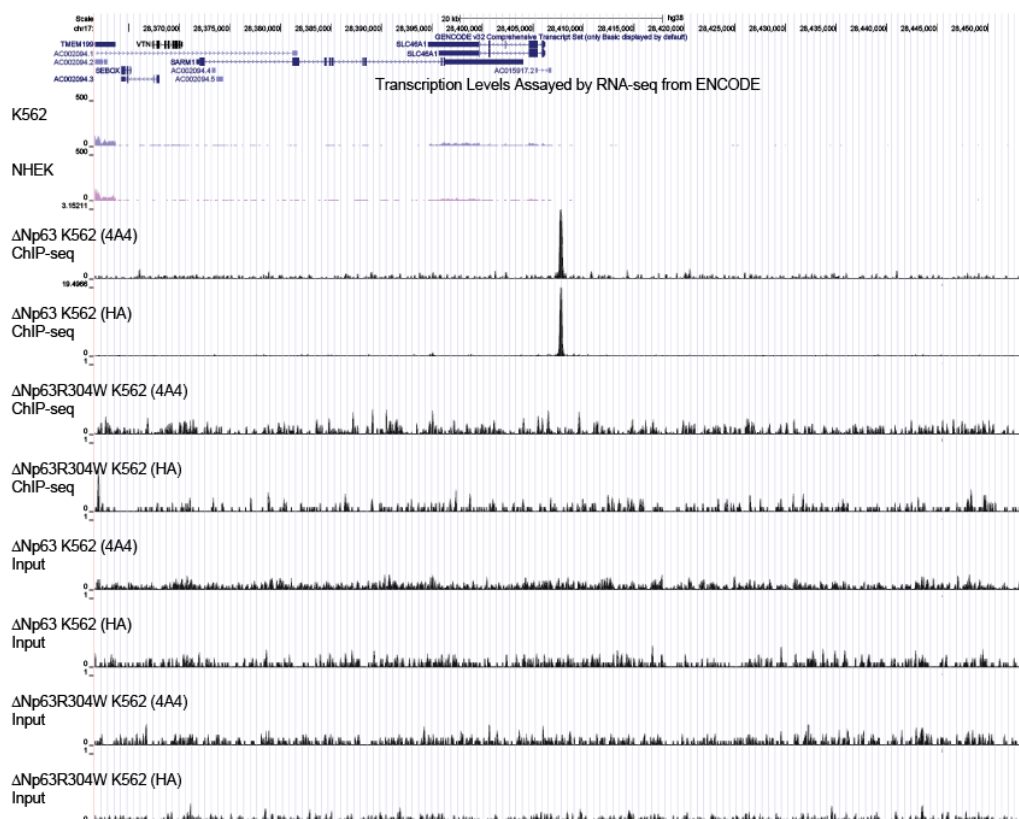

**Figure S3. Browser screen shots showing ChIP-seq experiments.** Replicate ChIP-seq experiments using antibodies 4A4 and HA for  $\Delta$ Np63 $\alpha$  and  $\Delta$ Np63(R304W) with their accompanying inputs. Transcription levels from ENCODE polyadenylated RNA-seq is shown for K562 and NHEK cell lines.

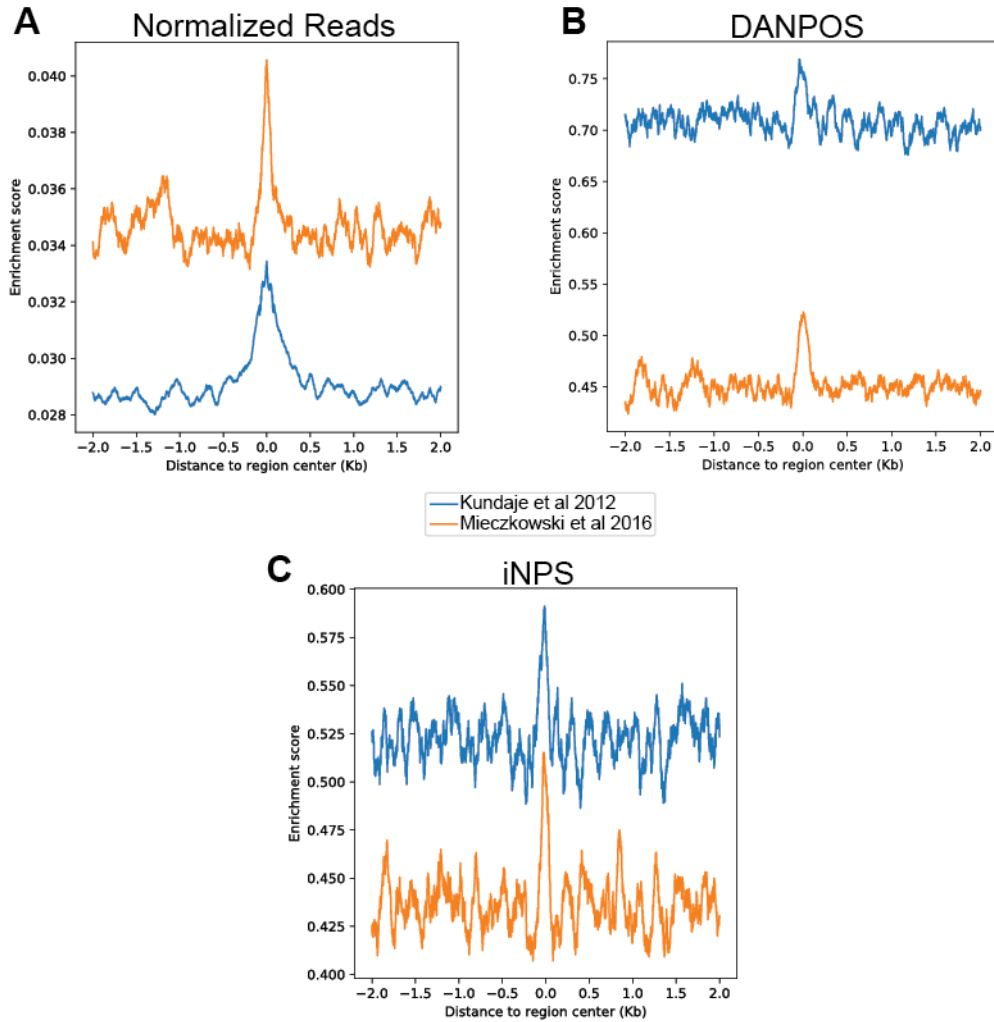

**Figure S4. Nucleosomes are enriched at  $\Delta Np63\alpha$  binding sites in K562.** Two K562 datasets from the NucMap database from Kundaje et al 2012 and Mieczkowski 2016 are shown [1-3]. **(A)** Normalized reads, **(B)** called nucleosomes with DANPOS [5], and **(C)** called nucleosomes with iNPS [6].

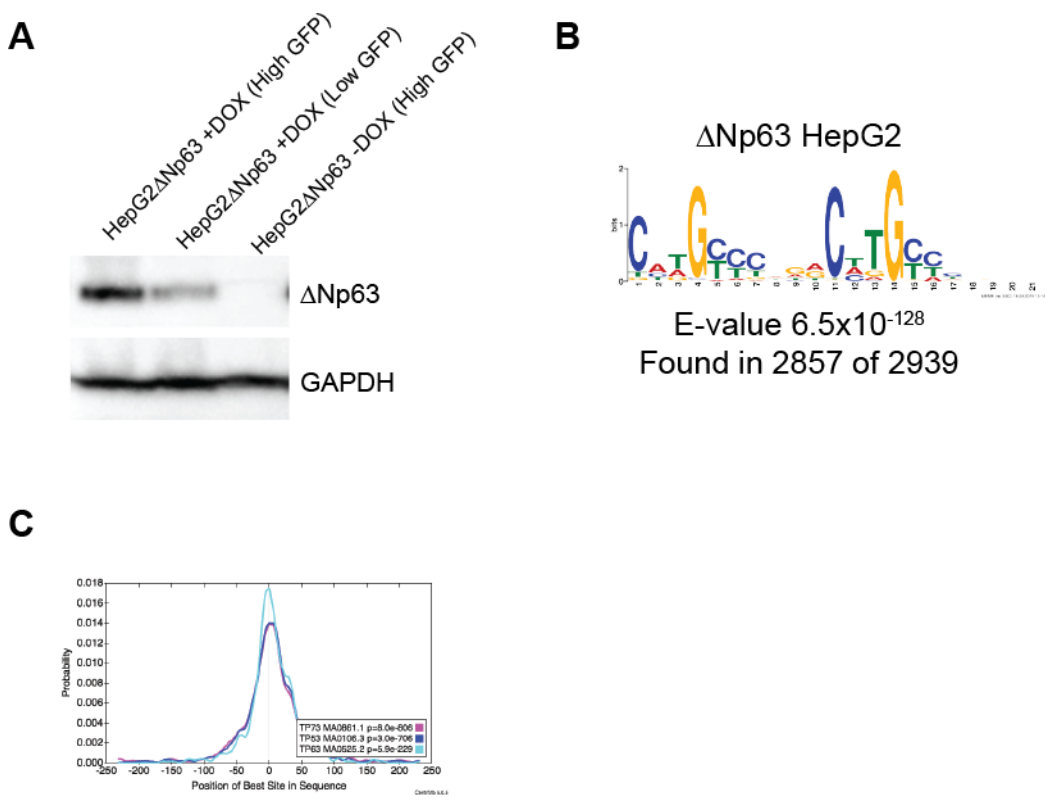

**Figure S5. Ectopic expression of p63 protein in HepG2.**

(A) Western blot analysis of  $\Delta$ Np63 $\alpha$  expression induced in HepG2 cells with 300ng/ml of doxycycline (DOX). (B) MEME analysis of  $\Delta$ Np63 ChIP-seq from HepG2 [4]. (C) CentriMo analysis showing the center enrichment for three p53 family members' motif (p53, p63, p73) for HepG2  $\Delta$ Np63 ChIP-seq [7].

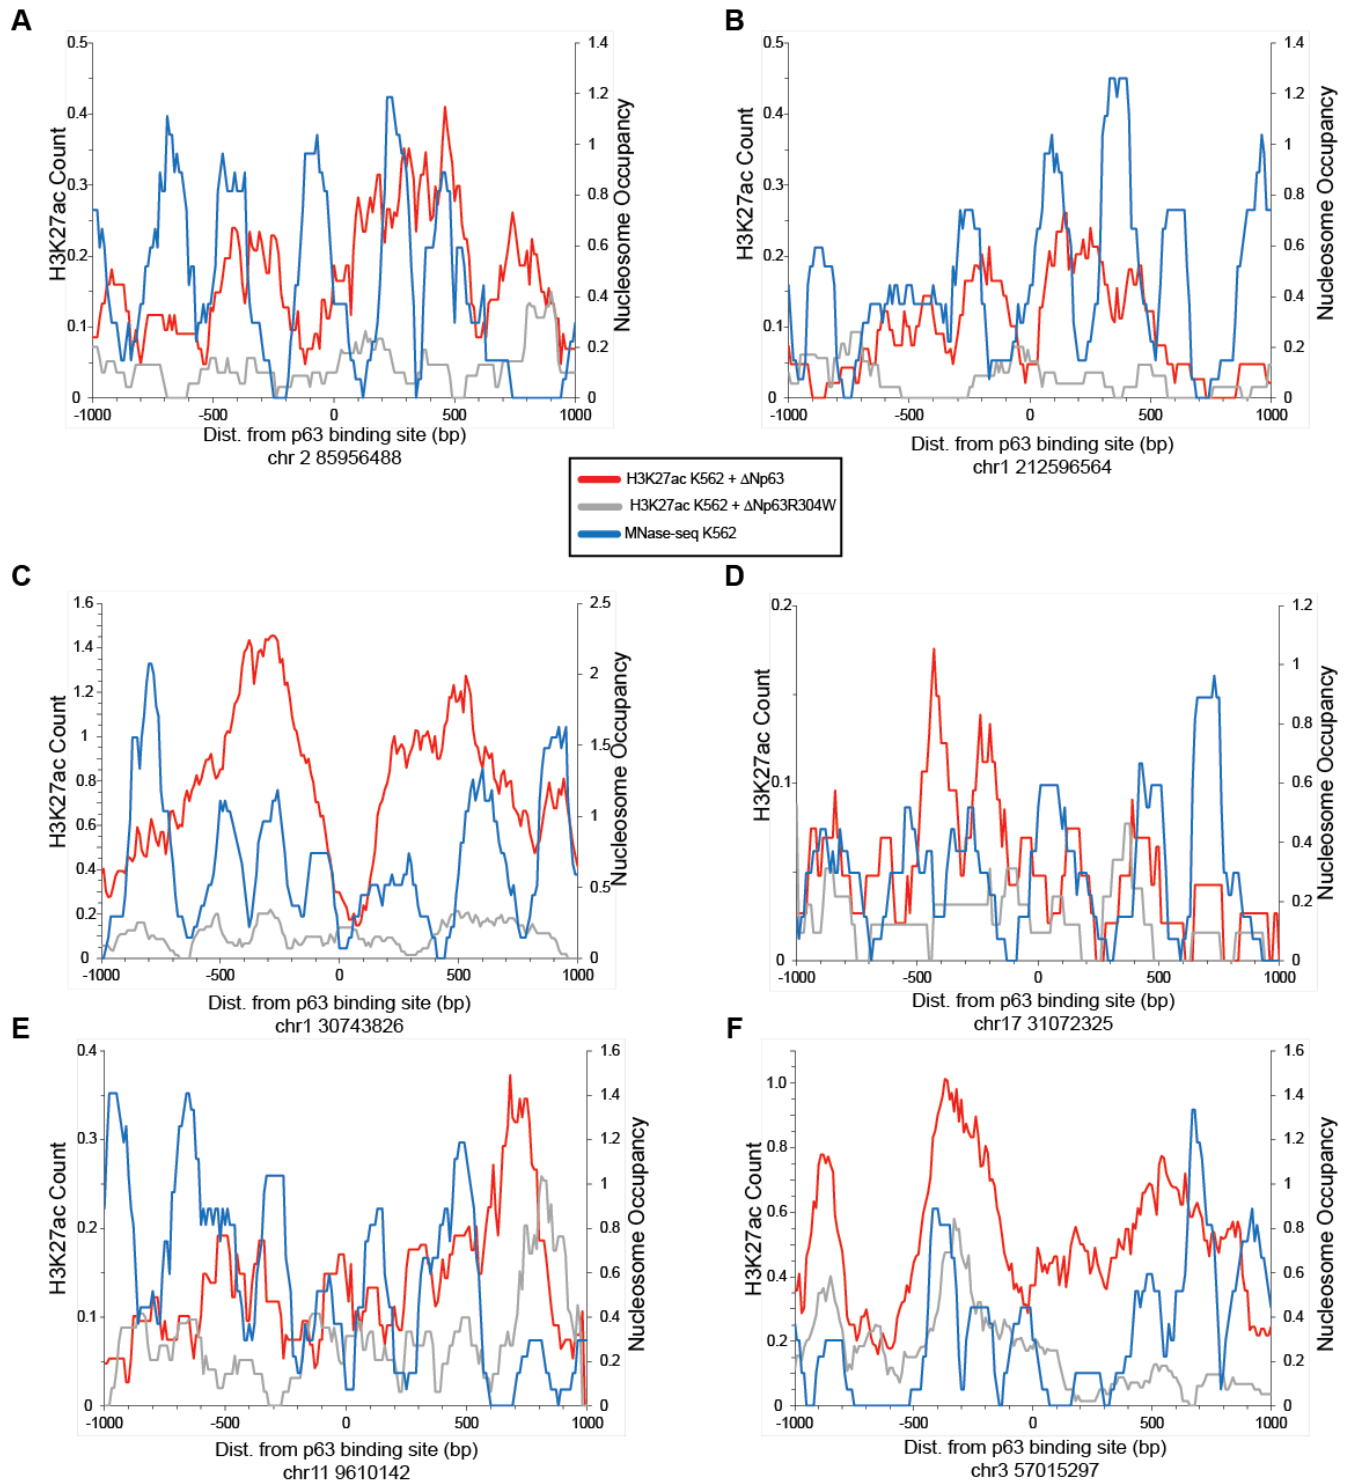

**Figure S7. Nucleosome occupancy and H3K27ac at  $\Delta$ Np63 binding sites.** (A-F) H3K27ac at two p63BS. Average H3K27ac from two replicate experiments for K562 +  $\Delta$ Np63 and K562 +  $\Delta$ Np63(R304W). Nucleosome occupancy as determined from MNase-seq from non-p63 expressing K562 [3].

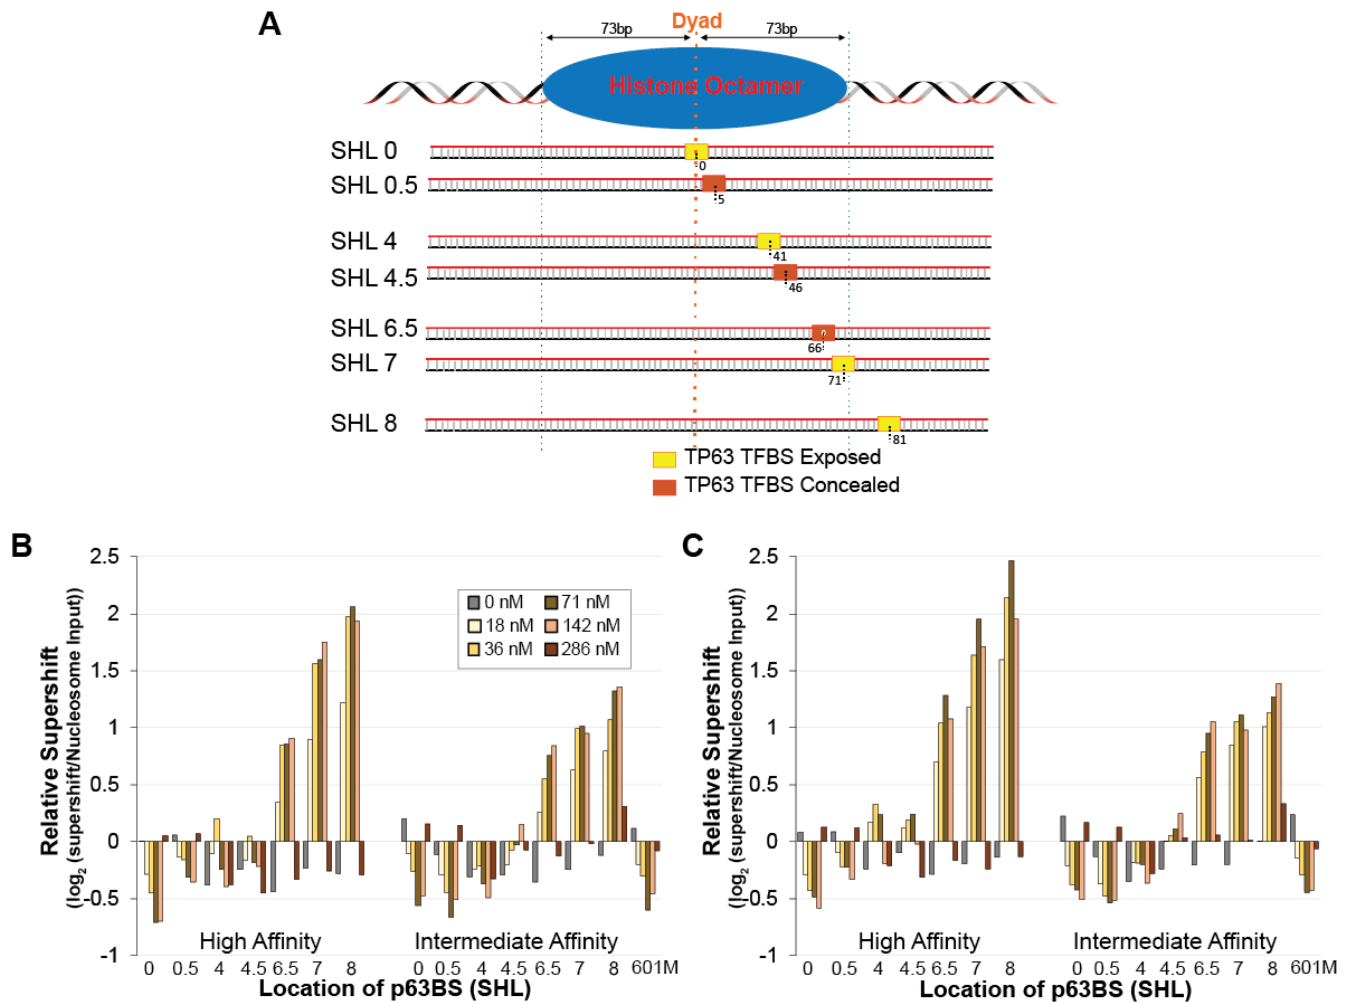

**Figure S8. Relative supershift values from the supershifted bands (Ss).**

**(A)** 217-bp dsDNA library was designed containing p63BS in various nucleosomal positions. A 20-bp-long p63BS (low- and high-affinity) was placed at different positions with 0-bp, 5-bp, 41-bp, 46-bp, 66-bp, 71-bp, 81-bp away from the dyad. The superhelix location (SHL) is designated for each nucleosome sequence. **(B-C)** Lanes contain the following: 1– 0.25 pmol nucleosomes, 2-5 contain 0.25 pmol of nucleosomes with 18, 36, 71, 142, or 286 nM of p63 (0.125, 0.25, 0.5, 1, or 2 pmol).



1. Zhao Y, Wang J, Liang F, Liu Y, Wang Q, Zhang H, Jiang M, Zhang Z, Zhao W, Bao Y *et al*: **NucMap: a database of genome-wide nucleosome positioning map across species**. *Nucleic Acids Res* 2019, **47**(D1):D163-D169.
2. Kundaje A, Kyriazopoulou-Panagiotopoulou S, Libbrecht M, Smith CL, Raha D, Winters EE, Johnson SM, Snyder M, Batzoglou S, Sidow A: **Ubiquitous heterogeneity and asymmetry of the chromatin environment at regulatory elements**. *Genome Res* 2012, **22**(9):1735-1747.
3. Mieczkowski J, Cook A, Bowman SK, Mueller B, Alver BH, Kundu S, Deaton AM, Urban JA, Larschan E, Park PJ *et al*: **MNase titration reveals differences between nucleosome occupancy and chromatin accessibility**. *Nat Commun* 2016, **7**:11485.
4. Bailey TL, Boden M, Buske FA, Frith M, Grant CE, Clementi L, Ren J, Li WW, Noble WS: **MEME SUITE: tools for motif discovery and searching**. *Nucleic Acids Res* 2009, **37**(Web Server issue):W202-208.
5. Chen K, Xi Y, Pan X, Li Z, Kaestner K, Tyler J, Dent S, He X, Li W: **DANPOS: dynamic analysis of nucleosome position and occupancy by sequencing**. *Genome Res* 2013, **23**(2):341-351.
6. Chen W, Liu Y, Zhu S, Green CD, Wei G, Han JD: **Improved nucleosome-positioning algorithm iNPS for accurate nucleosome positioning from sequencing data**. *Nat Commun* 2014, **5**:4909.
7. Bailey TL, Machanick P: **Inferring direct DNA binding from ChIP-seq**. *Nucleic Acids Res* 2012, **40**(17):e128.
8. Consortium EP: **An integrated encyclopedia of DNA elements in the human genome**. *Nature* 2012, **489**(7414):57-74.
