# Supplementary material for: ΔNp63 is a pioneer factor that binds inaccessible chromatin and elicits chromatin remodeling
Source: Epigenetics Chromatin. 2021 Apr 17;14:20. doi: 10.1186/s13072-021-00394-8 (PMC8053304; doi:10.1186/s13072-021-00394-8)
Supplement: Supplementary file 2 — Additional file 2: Table S1. Sequence details for competitive nucleosome binding assays. [file 13072_2021_394_MOESM2_ESM.pdf]

**Table S1. Sequence details of competitive nucleosome binding assays**

| Binding site location | p63 binding site      | Nucleosome Sequence                                                                                                                                                                                                        |
|-----------------------|-----------------------|----------------------------------------------------------------------------------------------------------------------------------------------------------------------------------------------------------------------------|
| SHL 0                 | High Affinity         | GATGGACCCCTATACGCGCGCCCTGGAGAATCCCGGTGCCGAGGCCGCTCAATTGGTCGTAGACAGCTCTAGCACCGCTTAAACGCACGTACGCGCATGTCCCTAACCG<br>CCAAGGGGATTACTCCCTAGTCTCCAGGCACGTGTCAAGATATATACATCCTGTGAGGTATTGAACAGCGACCTTGCCCGTGCAGTCGGATAGTGTTC        |
| SHL 0.5               | High Affinity         | GATGGACCCCTATACGCGCGCCCTGGAGAATCCCGGTGCCGAGGCCGCTCAATTGGTCGTAGACAGCTCTAGCACCGCTTAAACGCACGTACGCGCATGTCCCGGCATGTCCG<br>CCAAGGGGATTACTCCCTAGTCTCCAGGCACGTGTCAAGATATATACATCCTGTGAGGTATTGAACAGCGACCTTGCCCGTGCAGTCGGATAGTGTTC    |
| SHL 4                 | High Affinity         | GATGGACCCCTATACGCGCGCCCTGGAGAATCCCGGTGCCGAGGCCGCTCAATTGGTCGTAGACAGCTCTAGCACCGCTTAAACGCACGTACGCGCTGTCCCCCGGTTTTAACCG<br>CCAAGGGGATTACTCCGCGCATGTCCGCGCATGTCCAGATATATACATCCTGTGAGGTATTGAACAGCGACCTTGCCCGTGCAGTCGGATAGTGTTC   |
| SHL 4.5               | High Affinity         | GATGGACCCCTATACGCGCGCCCTGGAGAATCCCGGTGCCGAGGCCGCTCAATTGGTCGTAGACAGCTCTAGCACCGCTTAAACGCACGTACGCGCTGTCCCCCGGTTTTAACCG<br>CCAAGGGGATTACTCCTAGTCTCCAGGCACGTGTCAAGATATATACATCCTGTGAGGTATTGAACAGCGACCTTGCCCGTGCAGTCGGATAGTGTTC   |
| SHL 7                 | High Affinity         | GATGGACCCCTATACGCGCGCCCTGGAGAATCCCGGTGCCGAGGCCGCTCAATTGGTCGTAGACAGCTCTAGCACCGCTTAAACGCACGTACGCGCTGTCCCCCGGTTTTAACCG<br>CCAAGGGGATTACTCCCTAGTCTCCAGGCACGTGTCAAGATATATAGGCGATGTCCGCGCATGTCCAGCGACCTTGCCCGTGCAGTCGGATAGTGTTC  |
| SHL 6.5               | High Affinity         | GATGGACCCCTATACGCGCGCCCTGGAGAATCCCGGTGCCGAGGCCGCTCAATTGGTCGTAGACAGCTCTAGCACCGCTTAAACGCACGTACGCGCTGTCCCCCGGTTTTAACCG<br>CCAAGGGGATTACTCCCTAGTCTCCAGGCACGTGTCAAGATATATACATCCTGTGAGGTATTGAACAGCGACCTTGCCCGTGCAGTCGGATAGTGTTC  |
| SHL8                  | High Affinity         | GATGGACCCCTATACGCGCGCCCTGGAGAATCCCGGTGCCGAGGCCGCTCAATTGGTCGTAGACAGCTCTAGCACCGCTTAAACGCACGTACGCGCTGTCCCCCGGTTTTAACCG<br>CCAAGGGGATTACTCCCTAGTCTCCAGGCACGTGTCAAGATATATACATCCTGTGAGGTATTGAACAGCGACCTTGCCCGTGCAGTCGGATAGTGTTC  |
| SHL 0                 | Intermediate Affinity | GATGGACCCCTATACGCGCGCCCTGGAGAATCCCGGTGCCGAGGCCGCTCAATTGGTCGTAGACAGCTCTAGCACCGCTTAAACGCACGTAGCTGGGCATGTCTGGGCATAACCG<br>CCAAGGGGATTACTCCCTAGTCTCCAGGCACGTGTCAAGATATATACATCCTGTGAGGTATTGAACAGCGACCTTGCCCGTGCAGTCGGATAGTGTTC  |
| SHL 0.5               | Intermediate Affinity | GATGGACCCCTATACGCGCGCCCTGGAGAATCCCGGTGCCGAGGCCGCTCAATTGGTCGTAGACAGCTCTAGCACCGCTTAAACGCACGTACGCGAGCTGGGCATGTCTGGGCAG<br>CCAAGGGGATTACTCCCTAGTCTCCAGGCACGTGTCAAGATATATACATCCTGTGAGGTATTGAACAGCGACCTTGCCCGTGCAGTCGGATAGTGTTC  |
| SHL 4                 | Intermediate Affinity | GATGGACCCCTATACGCGCGCCCTGGAGAATCCCGGTGCCGAGGCCGCTCAATTGGTCGTAGACAGCTCTAGCACCGCTTAAACGCACGTACGCGCTGTCCCCCGGTTTTAACCG<br>CCAAGGGGATTACTCCAGACTGGGCATGTCTGGGCACAGATATATACATCCTGTGAGGTATTGAACAGCGACCTTGCCCGTGCAGTCGGATAGTGTTC  |
| SHL 4.5               | Intermediate Affinity | GATGGACCCCTATACGCGCGCCCTGGAGAATCCCGGTGCCGAGGCCGCTCAATTGGTCGTAGACAGCTCTAGCACCGCTTAAACGCACGTACGCGCTGTCCCCCGGTTTTAACCG<br>CCAAGGGGATTACTCCCTAGACTGGGCATGTCTGGGCATATATACATCCTGTGAGGTATTGAACAGCGACCTTGCCCGTGCAGTCGGATAGTGTTC    |
| SHL 7                 | Intermediate Affinity | GATGGACCCCTATACGCGCGCCCTGGAGAATCCCGGTGCCGAGGCCGCTCAATTGGTCGTAGACAGCTCTAGCACCGCTTAAACGCACGTACGCGCTGTCCCCCGGTTTTAACCG<br>CCAAGGGGATTACTCCCTAGTCTCCAGGCACGTGTCAAGATATATAAGACTGGGCATGTCTGGGCACAGCGACCTTGCCCGTGCAGTCGGATAGTGTTC |
| SHL 6.5               | Intermediate Affinity | GATGGACCCCTATACGCGCGCCCTGGAGAATCCCGGTGCCGAGGCCGCTCAATTGGTCGTAGACAGCTCTAGCACCGCTTAAACGCACGTACGCGCTGTCCCCCGGTTTTAACCG<br>CCAAGGGGATTACTCCCTAGTCTCCAGGCACGTGTCAAGATATATACATCCTGTGAGGTATTGAACAGCGACCTTGCCCGTGCAGTCGGATAGTGTTC  |
| SHL 8                 | Intermediate Affinity | GATGGACCCCTATACGCGCGCCCTGGAGAATCCCGGTGCCGAGGCCGCTCAATTGGTCGTAGACAGCTCTAGCACCGCTTAAACGCACGTACGCGCTGTCCCCCGGTTTTAACCG<br>CCAAGGGGATTACTCCCTAGTCTCCAGGCACGTGTCAAGATATATACATCCTGTGAGGTATTGAACAGCGACCTTGCCCGTGCAGTCGGATAGTGTTC  |
| 601-Modified          | Control               | GATGGACCCCTATACGCGCGCCCTGGAGAATCCCGGTGCCGAGGCCGCTCAATTGGTCGTAGACAGCTCTAGCACCGCTTAAACGCACGTACGCGCTGTCCCCCGGTTTTAACCG<br>CCAAGGGGATTACTCCCTAGTCTCCAGGCACGTGTCAAGATATATACATCCTGTGAGGTATTGAACAGCGACCTTGCCCGTGCAGTCGGATAGTGTTC  |
| 601                   | Control               | GATGGACCCCTATACGCGCGCCCTGGAGAATCCCGGTGCCGAGGCCGCTCAATTGGTCGTAGACAGCTCTAGCACCGCTTAAACGCACGTACGCGCTGTCCCCCGGTTTTAACCG<br>CCAAGGGGATTACTCCCTAGTCTCCAGGCACGTGTCAAGATATATACATCCTGTGAGGTATTGAACAGCGACCTTGCCCGTGCAGTCGGATAGTGTTC  |
